# Supplementary material for: Comparative Efficacy of Interventions for the Management of Oral Submucous Fibrosis: A Systematic Review and Network Meta-Analysis
Source: MDPI journal article supplement (doi:10.3390/jpm12081272), 2022-08-01
Supplement: s1 [file s1]

## Supporting information

### List of tables

Table S1 Search strategy

Table S2 Search algorithm for Medline, Embase, CENTRAL and Pubmed.

Table S3 Studies excluded with reason from full text screening.

Table S4 Studies Characteristics

Table S5 Global inconsistency test (mouth opening)

Table S6 Global inconsistency test (burning sensation)

Table S7 Local inconsistency test: the SIDE approach (node splitting)

### List of Figures

Figure S1 Loop-specific approach to assess the inconsistency in a network

Figure S2 Forest plot illustrating the mean improvement in mouth opening between lycopene and controls (other interventions)

Figure S3 Forest plot illustrating the mean improvement in mouth opening between combination therapy of hyaluronidase and corticosteroids with controls (other interventions)

Figure S4 Forest plot illustrating the mean improvement in mouth opening between curcumin and controls (other interventions)

Figure S5 Forest plot illustrating the mean improvement in mouth opening between Aloe vera and controls (other interventions)

Figure S6 Forest plot illustrating the reduction in burning sensation between Lycopene and controls (other interventions)

Figure S7 Forest plot illustrating the reduction in burning sensation between curcumin and controls (other interventions)

Figure S8 Funnel plot illustrating the mean improvement in mouth opening between lycopene and controls (other interventions)

Figure S9 Funnel plot illustrating the mean improvement in mouth opening between combination therapy of hyaluronidase and corticosteroids with controls (other interventions)

Figure S10 Funnel plot illustrating the mean improvement in mouth opening between curcumin and controls (other interventions)

Figure S11 Funnel plot illustrating the mean improvement in mouth opening between Aloe vera and controls (other interventions)

Table S1 Search strategy

|                        |                                                                                                                                                                                                                                                                                                   |
|------------------------|---------------------------------------------------------------------------------------------------------------------------------------------------------------------------------------------------------------------------------------------------------------------------------------------------|
| <b>Review question</b> | In adults with oral submucosal fibrosis, which medical intervention is more effective and safer for its management?                                                                                                                                                                               |
| <b>Population</b>      | Adults receiving medical treatment for oral submucous fibrosis.                                                                                                                                                                                                                                   |
| <b>Sub-group</b>       | If heterogeneity is present:<br><br>1. Drug doses<br><br>2. Dosing frequency                                                                                                                                                                                                                      |
| <b>Intervention</b>    | Any medical intervention which is used in the management of oral submucous fibrosis, including systemic and topical agents, traditional or complementary medication, as well as other active interventions.                                                                                       |
| <b>Comparison</b>      | Placebo, no treatment, or any intervention against those interventions mentioned above (including different doses of the same intervention).                                                                                                                                                      |
| <b>Outcomes</b>        | <i>Primary outcome:</i> Improvement in mouth opening in patients with oral submucous fibrosis<br><br><i>Secondary outcome:</i> relief of burning sensation, relief of dysphagia, adverse events ('probably due to drug'), compliance and development of drug resistance if mentioned by the study |
| <b>Study design</b>    | Randomized controlled trials (RCTs)                                                                                                                                                                                                                                                               |
| <b>Databases</b>       | Medline, Pubmed, Embase, CENTRAL                                                                                                                                                                                                                                                                  |

Table S2 Search algorithm for Medline, Embase, CENTRAL and Pubmed.

| Database               | Query                          |                                                                                                                                                          | Items found    |
|------------------------|--------------------------------|----------------------------------------------------------------------------------------------------------------------------------------------------------|----------------|
| <b>Medline on Ovid</b> | 1. Oral submucous fibrosis     | (oral submucous fibrosis or ("submucous fibrosis" and (oral or mouth)) or (oral submucous fibrosis and ("submucous fibrosis" and (oral or mouth))))).af. | 1516           |
|                        | 2. Randomized control trials   | (randomized controlled trial or controlled clinical trial or randomized or randomly or random or trial).af.                                              | 1949287        |
|                        | 3. Drug therapy                | (drug therapy or management or therapy or placebo or treatment).af.                                                                                      | 8839234        |
|                        | 4.                             | #1 AND #2 AND #3                                                                                                                                         | 99             |
| <b>Pubmed</b>          | 1. Oral submucous fibrosis     | "Oral Submucous Fibrosis"[Mesh] OR "submucous fibrosis" OR "submucous fibroses"                                                                          | <b>1548</b>    |
|                        | 2. Randomized controlled trial | "randomized controlled trial*" OR "randomised controlled trial*" OR "randomized" OR "controlled trial"                                                   | <b>912387</b>  |
|                        | 3. Drug therapy                | "Drug Therapy"[Mesh] OR "treatment" OR "therapy*" OR "management"                                                                                        | <b>9161947</b> |
|                        | 4.                             | #1 AND #2 AND #3                                                                                                                                         | <b>68</b>      |
| <b>CENTRAL</b>         | 1. Oral submucous fibrosis     | "Oral Submucous Fibrosis" OR ((submucous NEXT fibrosis) AND (oral or mouth))                                                                             | 139            |
|                        | 2. Randomized controlled trial | "Randomized Controlled trial" OR "controlled clinical trial" OR "randomized"                                                                             | 1320289        |
|                        | 3. Drug therapy                | "drug therapy" OR "therapy" OR "management" OR "treatment"                                                                                               | 1069702        |
|                        | 4.                             | #1 AND #2 AND #3                                                                                                                                         | <b>80</b>      |

Table S3 Studies excluded with reason from full text screening.

| No | Author, Year       | Title                                                                                                                                                                          | Reason for rejection                                                  |
|----|--------------------|--------------------------------------------------------------------------------------------------------------------------------------------------------------------------------|-----------------------------------------------------------------------|
| 1  | Li YH et al, 2019  | A Comparative Study to Evaluate Efficacy of Curcumin and Aloe Vera Gel along with Oral Physiotherapy in the Management of Oral Submucous Fibrosis: A Randomized Clinical Trial | Ineligible management (not drug therapy)                              |
| 2  | Dani et al, 1992   | The effectiveness of therapeutic ultrasound in patients with oral submucosal fibrosis                                                                                          | Ineligible management (not drug therapy)                              |
| 3  | Lyu FY et al, 2016 | Expression of secreted frizzled-related protein-1 in patient with oral submucous fibrosis                                                                                      | Ineligible management (no drug management included)                   |
| 4  | Wu et al, 2010     | Therapeutic effect of the combination of traditional Chinese medicine and western medicine on patients with oral submucous fibrosis                                            | Article completely in Chinese language                                |
| 5  | Borle et al, 2009  | Extended nasolabial flaps in the management of oral submucous fibrosis                                                                                                         | Ineligible management (not drug therapy)                              |
| 6  | Cox et al, 2009.   | Physiotherapeutic treatment improves oral opening in oral submucous fibrosis                                                                                                   | Ineligible management (not drug therapy)                              |
| 7  | Khanna et al, 2006 | Circulating immune complexes and trace elements (Copper, Iron and Selenium) as markers in oral precancer and cancer: a randomised, controlled clinical trial                   | Ineligible management (no drug management included)                   |
| 8  | Sun A et al, 2001  | Levamisole and/or Chinese medicinal herbs can modulate the serum level of squamous cell carcinoma associated antigen in patients with erosive oral lichen planus.              | Ineligible subjects (subjects consist of oral lichen planus patients) |

|    |                        |                                                                                                                                                                                 |                                                      |
|----|------------------------|---------------------------------------------------------------------------------------------------------------------------------------------------------------------------------|------------------------------------------------------|
| 9  | Bande C et al, 2016    | Immediate versus delayed aggressive physical therapy following buccal fat pad interposition in oral submucous fibrosis-a prospective study in Central India                     | Ineligible management (not drug therapy)             |
| 10 | Pardeshi P et al, 2015 | Clinical evaluation of nasolabial flap & buccal fat pad graft for surgical treatment of oral submucous fibrosis-a randomized clinical trial on 50 patients in Indian population | Ineligible management (not drug therapy)             |
| 11 | Ambereen A et al, 2020 | Is Coronoidectomy Superior to Coronoidotomy for Improving Maximum Incisal Opening in Patients With Oral Submucous Fibrosis?                                                     | Ineligible management (not drug therapy)             |
| 12 | Ganguly R et al, 2020  | Evaluation of efficacy of herbal preparation in the management of oral submucous fibrosis: a study.                                                                             | No specific management stated                        |
| 13 | Vibha S et al, 2019.   | Evaluation of herbal preparation in management of oral submucous fibrosis.                                                                                                      | No specific management stated                        |
| 14 | Chloe RH et al, 2011   | A randomized controlled trail of lycopene in oral submucous fibrosis.                                                                                                           | Outcomes are expressed in the form of percentages    |
| 15 | Singh M et al, 2010    | Efficacy of hydrocortisone acetate/hyaluronidase vs triamcinolone acetonide/hyaluronidase in the treatment of oral submucous fibrosis                                           | No primary outcome available                         |
| 16 | Krishnamoorthy B, 2013 | Management of oral submucous fibrosis by two different drug regimens: A comparative study                                                                                       | No values given. Only numberings are provided.       |
| 17 | Baptist J et al, 2016  | Rebamipide to Manage Stomatopyrosis in Oral Submucous Fibrosis                                                                                                                  | No primary outcome available                         |
| 18 | Daga D et al, 2017     | Efficacy of oral colchicine with intralesional hyaluronidase or triamcinolone acetonide in the Grade II oral submucous fibrosis                                                 | For primary outcome only mean given and not standard |

|    |                       |                                                                                                                                                                  |                                                                                      |
|----|-----------------------|------------------------------------------------------------------------------------------------------------------------------------------------------------------|--------------------------------------------------------------------------------------|
|    |                       |                                                                                                                                                                  | deviation and secondary outcome no values were given                                 |
| 19 | Rajendran et al, 2006 | Pentoxifylline therapy: A new adjunct in the treatment of oral submucous fibrosis                                                                                | The outcome is expressed in p value only                                             |
| 20 | Mehrotra R, 2010      | Pentoxifylline Therapy in the Management of Oral Submucous Fibrosis                                                                                              | Only percentage is given in the outcomes                                             |
| 21 | Kalkur C et al, 2019  | "Introducing Modified Dakkak and Bennett Grading System for Indian Food in Oral Submucous Fibrosis": A Dharwad Study                                             | No primary outcome provided and no baseline value for secondary outcomes             |
| 22 | Goel S et al, 2015    | A comparative study on efficacy of different treatment modalities of oral submucous fibrosis evaluated by clinical staging in population of Southern Rajasthan   | The patient groups are divided into stage 1, 2 and 3 and not all patients as a whole |
| 23 | Alam S et al, 2010    | Efficacy of aloe vera gel as an adjuvant treatment of oral submucous fibrosis                                                                                    | Surgical treatment is one of the treatment options in this study                     |
| 24 | Deepa AD et al, 2010  | Comparative study of the efficacy of curcumin and turmeric oil as chemopreventive agents in oral submucous fibrosis: a clinical and histopathological evaluation | No mean and SD provided in the outcomes                                              |
| 25 | Singh U et al, 2016   | Efficacy and Safety of Intralesional Xantinol Nicotinate in the Treatment of Various Stages of Oral Submucous Fibrosis                                           | No baseline value provided                                                           |

|    |                         |                                                                                                                                                                                          |                                                                               |
|----|-------------------------|------------------------------------------------------------------------------------------------------------------------------------------------------------------------------------------|-------------------------------------------------------------------------------|
| 26 | Raizada MK et al, 2017  | Omega 3: a novel treatment agent in oral submucous fibrosis: a pilot study                                                                                                               | No mean and SD provided in the outcomes                                       |
| 27 | Shah A et al, 2018      | Comparison of systemic and topical forms of curcumin in oral submucous fibrosis: A clinical and histopathological evaluation in 120 patients                                             | No mean and SD provided in the outcomes                                       |
| 28 | Lanjekar AB et al, 2020 | Comparison of Efficacy of Topical Curcumin Gel with Triamcinolone-hyaluronidase Gel Individually and in Combination in the Treatment of Oral Submucous Fibrosis                          | No mean and SD provided in the outcomes                                       |
| 30 | Patil et al 2014        | Comparison of Alovera and Pentoxifylline                                                                                                                                                 | Outcomes not properly defined                                                 |
| 31 | Prabhu et al 2015       | Pentoxifylline with conventional therapies including intralesional corticosteroid, hyaluronidase and placentrix injections, along with local heat therapy and mouth stretching exercises | Mouth stretching exercises and heat therapy also included with drug treatment |

Table S4: Studies Characteristics

| S. No | Author, year, country               | Population details                                |                                                                                                                                                                                                       | Variables evaluate | Main outcomes                                                        |
|-------|-------------------------------------|---------------------------------------------------|-------------------------------------------------------------------------------------------------------------------------------------------------------------------------------------------------------|--------------------|----------------------------------------------------------------------|
|       |                                     | No/Age                                            | Study groups (intervention and control groups)                                                                                                                                                        |                    |                                                                      |
| 1     | Kumar A et al [14], 2007, India     | No-58<br>Age-18-70 years                          | G1 – Lycopene tablets (n=21)<br>G2- Lycopene tablets and intralesional betamethasone (n=19)<br>G3- placebo tablets (n=18)                                                                             | MO, BS, TP, FB     | G1 & G2 (MO & BS) – SSD<br>G3 (MO & BS) –SNSD                        |
| 2     | Karemore T. et al [177] 2012, India | No-92<br>Age -17-57 years                         | Groups - According to staging by Khanna and Andrade<br>G1- Lycopene tablets (n=46)<br>G2- placebo tablets (n=46)                                                                                      | MO, BS, UL         | MO & BS (SSD)                                                        |
| 3     | Sudarshan R et al [18], 2012, India | No – 20 Age – 17-40 years                         | Groups – According to Pindborg et al<br>G1 – Aloe vera gel (n = 10)<br>G2 – Antioxidant capsules (n=10)                                                                                               | MO, BS, TP, CF     | BS – SSD<br>MO, TP, CF - SNSD (with improvement)                     |
| 4     | Bhadage CJ et al [178], 2013, India | No – 40 Age - 18-48(G1)<br>23-45(G2)<br>22-50(G3) | G1 – Isoxsuprine tablets (n=15)<br>G2 – Intralesional dexamethasone + hyaluronidase (n=15)<br>G3 – Placebo tablets                                                                                    | MO, BS             | MO-SNSD<br>BS-SSD                                                    |
| 5     | Selvam et al, 2013 [179], India     | No – 45<br>Age – 18-50 years                      | G1 – lycopene+ intralesional dexamethasone + hyaluronidase (n=15)<br>G2 – antioxidant + intralesional dexamethasone + hyaluronidase (n=15)<br>G3 – Intralesional dexamethasone + hyaluronidase (n=15) | MO, BS             | MO – Intragroup SSD<br>Intergroup G1 vs G3; G2 vs G3 SSD<br>BS - SSD |
| 6     | Jiang XW et al [6], 2013, China     | No – 42 Age – 32.8 years(mean)                    | G1 – Intralesional triamcinolone (n =14)                                                                                                                                                              | MO, BS             | No information on statistical                                        |



|    |                                      |                                                                   |                                                                                                                                                        |                         |                                                                                                               |
|----|--------------------------------------|-------------------------------------------------------------------|--------------------------------------------------------------------------------------------------------------------------------------------------------|-------------------------|---------------------------------------------------------------------------------------------------------------|
|    |                                      |                                                                   | G2 – Intralesional salvianolic acid B (n = 14)<br>G3 – Intralesional triamcinolone + Salvianolic acid B (n = 14)                                       |                         | difference provided                                                                                           |
| 7  | Panigrahi R et al [180], 2014, India | No – 20<br>Age – 22-52 years                                      | G1 – Intralesional triamcinolone + hyaluronidase (n=10)<br>G2 – Intralesional triamcinolone (n=10)                                                     | MO, UL, FB              | MO, UL, FB - SSD                                                                                              |
| 8  | Singh D et al [181], 2014, India     | No – 44<br>Age – G1: 29.41 ± 9.11 years<br>G2: 25.59 ± 6.98 years | Group – Classification by Lai DR<br>G1: Lycopene tablets (n=22)<br>G2: Intralesional betamethasone (n=22)                                              | MO, BS                  | MO, BS - SSD                                                                                                  |
| 9  | Patil S et al [182], 2014 India      | No – 68<br>Age - 30.9 ± 12.8 years (mean)                         | G1: Spirulina tablets (n=34)<br>G2: Lycopene tablets (n = 34)                                                                                          | MO,BS, UL,P             | MO- G2 SSD<br>BS – SNSD                                                                                       |
| 10 | Patil S et al [183], 2014 India      | No – 42<br>Age - 31.2 ± 12.4 (mean)                               | G1: spirulina tablets (n=21)<br>G2: Aloe vera gel (n=21)                                                                                               | MO, UL, BS, P           | MO, UL – SSD in G1<br>BS, P - SNSD                                                                            |
| 11 | Patil S et al [184], 2014 India      | No – 120<br>Age - 31.6±12.7 years (mean)                          | G1: oxitard capsules (n=60)<br>G2: aloe vera gel (n=60)                                                                                                | MO, BS, TP, P, DS1, DS2 | MO, TP, P, DS1, DS2– SSD in G1<br>BS- SNSD                                                                    |
| 12 | Yadav M et al [185], 2014, India     | No – 40<br>Age – 32 year (mean)                                   | Group - According to staging by Khanna and Andrade<br>G1: Intralesional dexamethasone + hyaluronidase (n=20)<br>G2: Curcumin + piperine tablets (n=20) | BS, MO, TP              | BS -SSD in G2<br>MO-SSD for both end of 1 <sup>st</sup> month<br>TP – SSD for G1 end of 1 <sup>st</sup> month |
| 13 | Jiang X et al [186], 2015, China     | No – 52<br>Age - 21-35 (G1) 22-37 (G2)                            | G1: Intralesional triamcinolone (n=26)<br>G2: Intralesional allicin (n=26)                                                                             | MO, BS                  | MO- SSD in 16 and 40 weeks for G2                                                                             |

|    |                                        |                                            |                                                                                                                                                          |                         |                                                                                           |
|----|----------------------------------------|--------------------------------------------|----------------------------------------------------------------------------------------------------------------------------------------------------------|-------------------------|-------------------------------------------------------------------------------------------|
|    |                                        |                                            |                                                                                                                                                          |                         | BS- SSD in 8 and 40 weeks for G2                                                          |
| 14 | Alora Veedu R et al [120], 2015, India | No – 45<br>Age – 19-60 years               | G1: Intralesional Hyaluronidase (n=15)<br>G2: Intralesional dexamethasone (n=15)<br>G3: Intralesional hyaluronidase + intralesional dexamethasone (n=15) | BS, P, MO               | BS- SSD but not 3 months after treatment<br>P – SSD in G3<br>MO – SSD but SNSD in month 6 |
| 15 | Patil S et al [187], 2015 India        | No – 120<br>Age - 31.6 ± 12.7 years (mean) | G1: lycopene tablets (n=60)<br>G2: aloe vera gel (n=60)                                                                                                  | MO, BS, TP, P, DS1, DS2 | MO, TP-SSD in G1<br>BS, P, DS1, DS2 -SNSD                                                 |
| 16 | Nayak A et al [188], 2015, India       | No -72<br>Age - NM                         | G1: Lycopene tablets (n=24)<br>G2: Lycopene + vitamin E tablets (n=24)<br>G3: Placebo capsules (n=24)                                                    | MO, BS, UL              | SSD in G1 and G2                                                                          |
| 17 | Arshad O et al [189], 2015, Pakistan   | No – 45<br>Age - 36.49 ± 11.82 years       | G1: intralesional methylprednisolone (n=15)<br>G2: lycopene capsules (n=15)<br>G3: intralesional methylprednisolone + lycopene capsules (n=15)           | MO                      | MO – SSD for G1 and G3; G2 and G3<br>SNSD for G2 and G3                                   |
| 18 | Hazarey VK et al [190], 2015, India    | No – 30<br>Age – 18-50 years               | G1: curcumin lozenges (n= 15)<br>G2: clobetasol propionate 0.05% ointment (n=15)                                                                         | MO, BS                  | MO-SSD for G1<br>BS – SSD for G1 for spicy and normal food                                |
| 19 | Singh N et al [191], 2016, India       | No – 40<br>Age – 30-35 years (majority)    | G1: aloe vera gel TDS with physiotherapy QID (n=20)<br>G2: antioxidant capsules BD with physiotherapy QID (n = 20)                                       | MO, BS, TP, CP          | MO- SSD for both groups but G1 is significantly higher<br>BS – SSD for G1                 |

|    |                                     |                              |                                                                                                                                          |                |                                                                                                                                                                                                                                                                                                                                                                                                |
|----|-------------------------------------|------------------------------|------------------------------------------------------------------------------------------------------------------------------------------|----------------|------------------------------------------------------------------------------------------------------------------------------------------------------------------------------------------------------------------------------------------------------------------------------------------------------------------------------------------------------------------------------------------------|
|    |                                     |                              |                                                                                                                                          |                | TP- SNSD for both but G1 is significantly higher<br>CF- SNSD                                                                                                                                                                                                                                                                                                                                   |
| 20 | Kaur H et al [152], 2016, India     | No – 30<br>Age – 18-49 years | G1: Lycopene with intralesional dexamethasone and hyaluronidase (n=15)<br>G2: Intralesional dexamethasone and hyaluronidase alone (n=15) | MO, BS         | BS – intragroup SSD<br>MO- intragroup SSD for both<br>Inter group SSD for G1                                                                                                                                                                                                                                                                                                                   |
| 21 | Kopuri RKC et al [192], 2016, India | No – 30<br>Age - >15 years   | G1: Lycopene (n=15)<br>G2: Curcumin (n=15)                                                                                               | MO, BS, BL, FB | MO- intragroup SSD<br>Inter group G1 showed more improvement but not enough to be significant<br>BS- inter group G2 showed better improvement but do not differ enough to be statistically significant<br>FB- G1 showed better improvement but do not differ enough to be statistically significant<br>BL- G2 showed better reduction but do not differ enough to be statistically significant |

|    |                                     |                                           |                                                                                                                                                   |                         |                                                                                                                                                                                                                                                                                        |
|----|-------------------------------------|-------------------------------------------|---------------------------------------------------------------------------------------------------------------------------------------------------|-------------------------|----------------------------------------------------------------------------------------------------------------------------------------------------------------------------------------------------------------------------------------------------------------------------------------|
| 22 | Pipalia PR et al [193], 2016, India | No – 46<br>Age - 28.2 ± 7.05<br>(average) | G1: curcumin + black pepper capsules (n=23)<br>G2: nigella sativa capsules (n=23)                                                                 | MO, BS, TP, CF          | Significance levels not given; the overall response of G1 better than G2                                                                                                                                                                                                               |
| 23 | Anuradha A et al [161], 2017, India | No -74<br>Age - 32.7 ± 10.3 (mean)        | G1: aloe vera juice + aloe vera gel (n=37)<br>G2: intralesional hydrocortisone + hyaluronidase + antioxidant capsules (n=37)                      | MO, BS, TP, CF          | <u>End of 1<sup>st</sup> month</u><br>BS- significantly higher for G1<br>MO-SNSD<br>CF & TP – significantly higher for G1<br><u>End of 2<sup>nd</sup> month</u><br>G1 is significantly higher in all parameters<br><u>End of 3<sup>rd</sup> month</u><br>BS & MO-SNSD<br>CF & TP - SSD |
| 24 | Sadaksharam J et al [194], 2017     | No – 30<br>Age – 23-54 years              | Group - According to staging by Khanna and Andrade<br>G1: Pentoxifylline tablets (n=15)<br>G2: intralesional dexamethasone + hyaluronidase (n=15) | BS, MO                  | BS- SSD for both<br>MO-SSD for both with G2 with a higher degree of improvement                                                                                                                                                                                                        |
| 25 | Datarkar A et al [195], 2018, India | No – 64<br>Age – 16-38 years              | Group - According to staging by Khanna and Andrade<br>G1: prednisolone mouthwash (n=32)<br>G2: antioxidant capsules (n=32)                        | MO, BS                  | MO- G1 significantly higher than G2<br>BS- SSD in G1                                                                                                                                                                                                                                   |
| 26 | Patil S et al [196], 2018, India    | No – 120<br>Age - 31.6 ± 12.7 years       | G1: oxtard capsules (n=60)                                                                                                                        | MO, BS, TP, P, DS1, DS2 | MO, TP – SSD in both                                                                                                                                                                                                                                                                   |

|    |                                   |                                                               |                                                                                                                                       |                        |                                                                                                                                                                                             |
|----|-----------------------------------|---------------------------------------------------------------|---------------------------------------------------------------------------------------------------------------------------------------|------------------------|---------------------------------------------------------------------------------------------------------------------------------------------------------------------------------------------|
|    |                                   |                                                               | G2: lycopene capsules (n=60)                                                                                                          |                        | P, DS1, DS2-SSD in G1<br>BS-SNSD in both                                                                                                                                                    |
| 27 | Ara SA et al [197], 2018, India   | No-100<br>Age - 25.44 ± 5.43(G1)<br>25.42 ± 7.38(G2)          | Group – Classification by Mathur and Jha, Bailoor and Nagesh [209-211]<br>G1: placebo capsules (n=50)<br>G2: curcumin capsules (n=50) | MO, BS, DS1, P, CF, TP | All SSD in G2, SNSD in G1                                                                                                                                                                   |
| 28 | Saran G et al [198], 2018, India  | No – 60<br>Age - 26.00 ± 6.43 (G1)<br>27.90 ± 8.66(G2) (mean) | Group - Khanna and Andrade 1995 classification<br>G1: lycopene capsules (n=30)<br>G2: curcumin tablets (n=30)                         | MO, BS                 | MO, BS – intragroup SSD<br>Inter group SNSD<br>G1 shows better MO results than G2                                                                                                           |
| 29 | Piyush P et al [199], 2018, India | No – 90<br>Age – 17-60 years                                  | G1: cucurmin + piperine tablets (n=30)<br>G2: lycopene capsules (n=30)<br>G3: placebo capsules (n=30)                                 | MO, BS, CF, TP         | MO- SSD for G1 vs G3 and G2 vs G3;<br>SNSD for G1 vs G2<br>BS- SSD for G1 vs G3 and G2 vs G3;<br>SNSD for G1 vs G2<br>TP – SNSD<br>CF - SSD for G1 vs G3 and G2 vs G3;<br>SNSD for G1 vs G2 |
| 30 | Tp B et al [200], 2019, India     | No – 60<br>Age – 20-45 years                                  | G1: lycopene (n=20)<br>G2: lycopene + intralesional dexamethasone (n=20)                                                              | MO, BS                 | BS- SSD for G3 by end of 2 <sup>nd</sup> month<br>MO – SSD between groups by 3 <sup>rd</sup> month                                                                                          |

|    |                                     |                               |                                                                                                                      |            |                                                                                                                                |
|----|-------------------------------------|-------------------------------|----------------------------------------------------------------------------------------------------------------------|------------|--------------------------------------------------------------------------------------------------------------------------------|
|    |                                     |                               | G3: intralesional dexamethasone + hyaluronidase (n=20)                                                               |            |                                                                                                                                |
| 31 | Rai A et al [201], 2019, India      | No – 147<br>Age – 16-45 years | G1: antioxidant capsules (n=49)<br>G2: turmeric tablets (n=49)<br>G3: turmeric tablets and turmeric mouthwash (n=49) | MO, BS, TP | SSD for all at 12 weeks<br>BS – SNSD between groups<br>MO – SSD for G2 vs G3<br>TP – SSD for G1 vs G3                          |
| 32 | Rajbhoj AN et al [202], 2021, India | No – 60<br>Age – 15-55 years  | Group - Classification by Lai DR<br>G1: curcumin gel (n=30)<br>G2: aloe vera gel (n=30)                              | BS, MO     | BS-SSD intergroup and intragroup with more improvement in G2<br>MO -SNSD intergroup and intragroup with more improvement in G1 |

BS – Burning Sensation, MO- Mouth Opening, TP – Tongue Protrusion, CF – Cheek Flexibility,

P – pain, DS1 – Difficulty in speech, DS2 – Difficulty in swallowing, UL – Ulceration, FB –

Fibrous bands, BL – Blanching, SSD- Statistically Significant Difference, SNSD – Statistically

Non-Significant Difference, G1 – Group 1, G2- Group 2, G3- Group 3

Table S5: Global inconsistency test (mouth opening)

| Network outcome                              | Chi-square | P value for test of global inconsistency |
|----------------------------------------------|------------|------------------------------------------|
| Efficacy in terms of improving mouth opening | 117.04     | 0.000                                    |

Table S6: Global inconsistency test (burning sensation)

| Network outcome                                  | Chi-square | P value for test of global inconsistency |
|--------------------------------------------------|------------|------------------------------------------|
| Efficacy in terms of relieving burning sensation | 15.30      | 0.0091                                   |

Table S7: Local inconsistency test: the SIDE approach (node splitting)

| Trial comparisons | Direct comparisons |           | Indirect comparisons |           | Difference |           |      |
|-------------------|--------------------|-----------|----------------------|-----------|------------|-----------|------|
|                   | Coef.              | Std. Err. | Coef.                | Std. Err. | Coef.      | Std. Err. | P>z  |
| ALL-CORT *        | -2.29              | 2.30      | 4.89                 | 724.29    | -7.18      | 724.29    | 0.99 |

|                      |       |      |       |       |       |      |      |
|----------------------|-------|------|-------|-------|-------|------|------|
| ALV-ANT              | -1.93 | 1.80 | 0.75  | 2.319 | -2.68 | 2.93 | 0.36 |
| ALV-CUR              | 0.36  | 2.32 | 2.69  | 1.779 | -2.33 | 2.92 | 0.43 |
| ALV-<br>HYU+CORT+ANT | 0.2   | 2.80 | 2.42  | 2.44  | -2.22 | 3.72 | 0.55 |
| ALV-LYC              | 3.3   | 2.34 | 1.19  | 1.40  | 2.11  | 2.73 | 0.44 |
| ALV-OXT              | 8     | 2.37 | 6.201 | 2.71  | 1.79  | 3.60 | 0.62 |
| ALV-SPL              | 1.1   | 2.38 | -3.07 | 2.66  | 4.17  | 3.57 | 0.24 |
| ANT-CORT             | -1.61 | 2.36 | 1.61  | 1.97  | -3.22 | 3.07 | 0.30 |
| ANT-CORT+ANT<br>*    | 4.27  | 1.74 | 5.71  | 5.95  | -1.44 | 6.20 | 0.82 |
| ANT-CUR+PEP          | -0.69 | 2.41 | 1.95  | 2.36  | -2.64 | 3.37 | 0.43 |
| CORT-CORT+ANT        | 2.88  | 2.35 | 6.36  | 3.20  | -3.48 | 3.97 | 0.38 |
| CORT-CUR             | 3.27  | 2.46 | 2.05  | 1.75  | 1.22  | 3.01 | 0.69 |
| CORT-HYU*            | 2.34  | 2.61 | 5.44  | 5.28  | -3.10 | 5.89 | 0.60 |
| CORT-<br>HYU+CORT *  | 3.71  | 1.76 | 1.70  | 1.78  | 2.01  | 2.50 | 0.42 |
| CORT-LYC             | 0.11  | 1.78 | 3.90  | 1.46  | -3.79 | 2.29 | 0.10 |
| CORT-LYC+CORT        | 3.75  | 3.22 | 3.57  | 2.04  | 0.18  | 3.83 | 0.96 |



|                                |        |      |        |        |       |        |      |
|--------------------------------|--------|------|--------|--------|-------|--------|------|
| CUR-PLC                        | -10.12 | 1.85 | -2.18  | 1.36   | -7.94 | 2.30   | 0.00 |
| CUR-LYC                        | 2.15   | 1.55 | -2.11  | 1.49   | 4.26  | 2.15   | 0.05 |
| CUR+PEP-PLC                    | -2.43  | 2.53 | -3.10  | 2.23   | 0.67  | 3.35   | 0.84 |
| CUR+PEP-<br>HYU+CORT           | 1.88   | 2.36 | 2.73   | 2.12   | -0.85 | 3.17   | 0.79 |
| CUR+PEP-LYC                    | 0.13   | 2.58 | 3.00   | 1.88   | -2.87 | 3.18   | 0.37 |
| CUR+PEP-NIG *                  | -0.25  | 2.28 | -5.63  | 142.40 | 5.38  | 142.42 | 0.97 |
| HYU-HYU+CORT<br>*              | -0.8   | 2.56 | 2.31   | 5.35   | -3.11 | 5.90   | 0.60 |
| HYU+CORT-PLC *                 | -3.6   | 3.26 | -5.52  | 1.56   | 1.92  | 3.61   | 0.60 |
| HYU+CORT-<br>HYU+CORT+ANT      | 0.90   | 2.28 | -3.11  | 2.91   | 4.01  | 3.69   | 0.28 |
| HYU+CORT-ISO *                 | -1.1   | 3.33 | -4.94  | 7.05   | 3.84  | 7.22   | 0.60 |
| HYU+CORT-LYC                   | -0.01  | 1.70 | -0.58  | 1.62   | 0.48  | 2.35   | 0.84 |
| HYU+CORT-<br>LYC+CORT          | -0.44  | 2.33 | 2.17   | 2.27   | -2.61 | 3.25   | 0.42 |
| HYU+CORT-<br>LYC+CORT+HYU<br>* | 1.9    | 2.29 | -10.34 | 237.23 | 12.24 | 237.24 | 0.96 |

|                      |       |      |        |        |       |        |      |
|----------------------|-------|------|--------|--------|-------|--------|------|
| HYU+CORT-PENT<br>*   | 1.8   | 2.31 | -10.33 | 597.24 | 12.13 | 597.24 | 0.98 |
| HYU+CORT+ANT-<br>LYC | 0.53  | 2.43 | -0.01  | 2.66   | 0.54  | 3.63   | 0.88 |
| ISO-PLC *            | -2.5  | 3.86 | -6.34  | 6.18   | 3.84  | 7.22   | 0.60 |
| LYC-PLC *            | -3.43 | 1.14 | -8.43  | 1.82   | 5.00  | 2.15   | 0.02 |
| LYC-LYC+CORT *       | 2.25  | 1.61 | -3.28  | 3.44   | 5.54  | 3.81   | 0.15 |
| LYC-LYC + VIT E *    | 0.9   | 2.44 | -0.39  | 4.81   | 1.29  | 5.39   | 0.81 |
| LYC-OXT              | 4.7   | 2.38 | 6.49   | 2.70   | -1.79 | 3.60   | 0.62 |
| LYC-SPL              | -4.3  | 2.35 | -0.13  | 2.690  | -4.17 | 3.57   | 0.2  |
| LYC+CORT-PLC         | -4.54 | 3.40 | -6.58  | 1.98   | 2.04  | 3.93   | 0.60 |
| LYC+VIT E-PLC *      | -5.2  | 2.39 | -6.49  | 4.88   | 1.29  | 5.39   | 0.81 |

Abbreviations: HYU- Hyaluronidase; CORT- Corticosteroid; LYC– Lycopene; ALL- Allicin; ANT – Antioxidant; CUR – Curcumin; ALV – Aloe vera; SPL – Spirulina; OXT – Oxitard; VIT E – Vitamin E; PEP – Piperine; NIG – Nigella sativa; PLC – Placebo; ISO – Isoxsuprine; PENT – Pentoxifylline

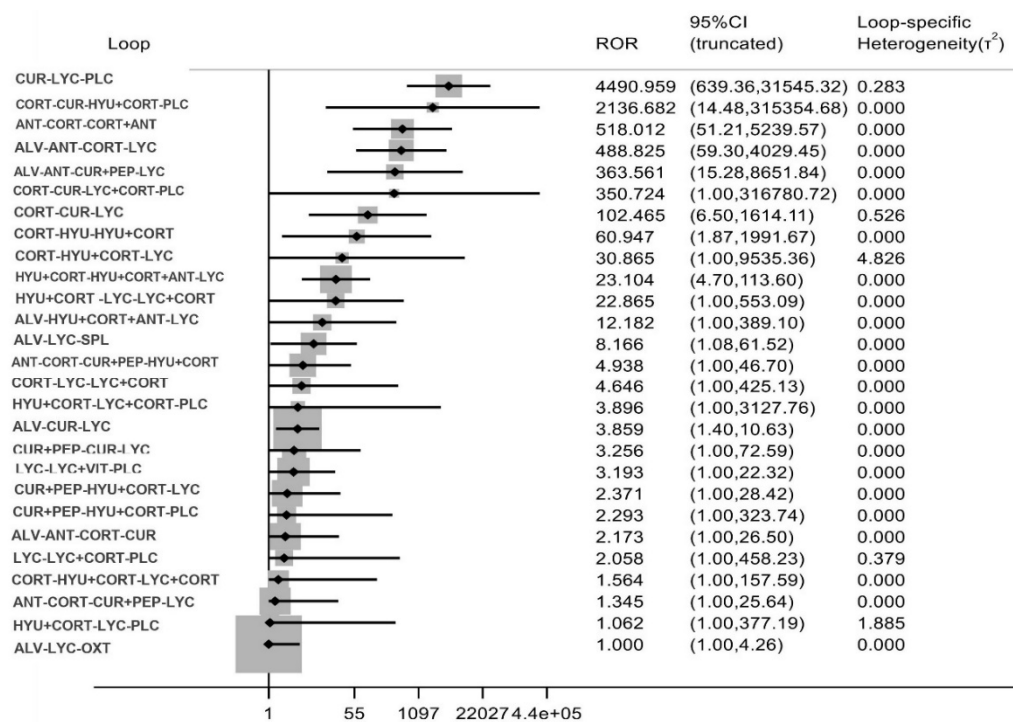

Figure S1 : Loop-specific approach to assess the inconsistency in a network

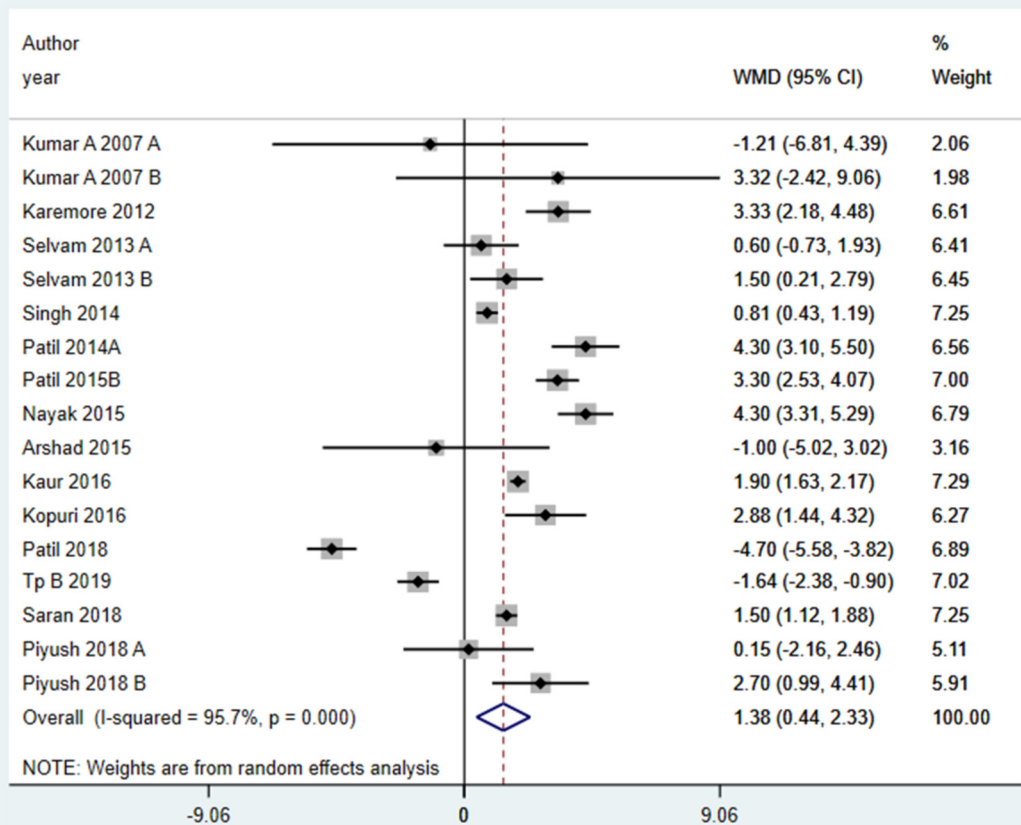

Figure S2: Forest plot illustrating the mean improvement in mouth opening between lycopene and controls (other interventions)

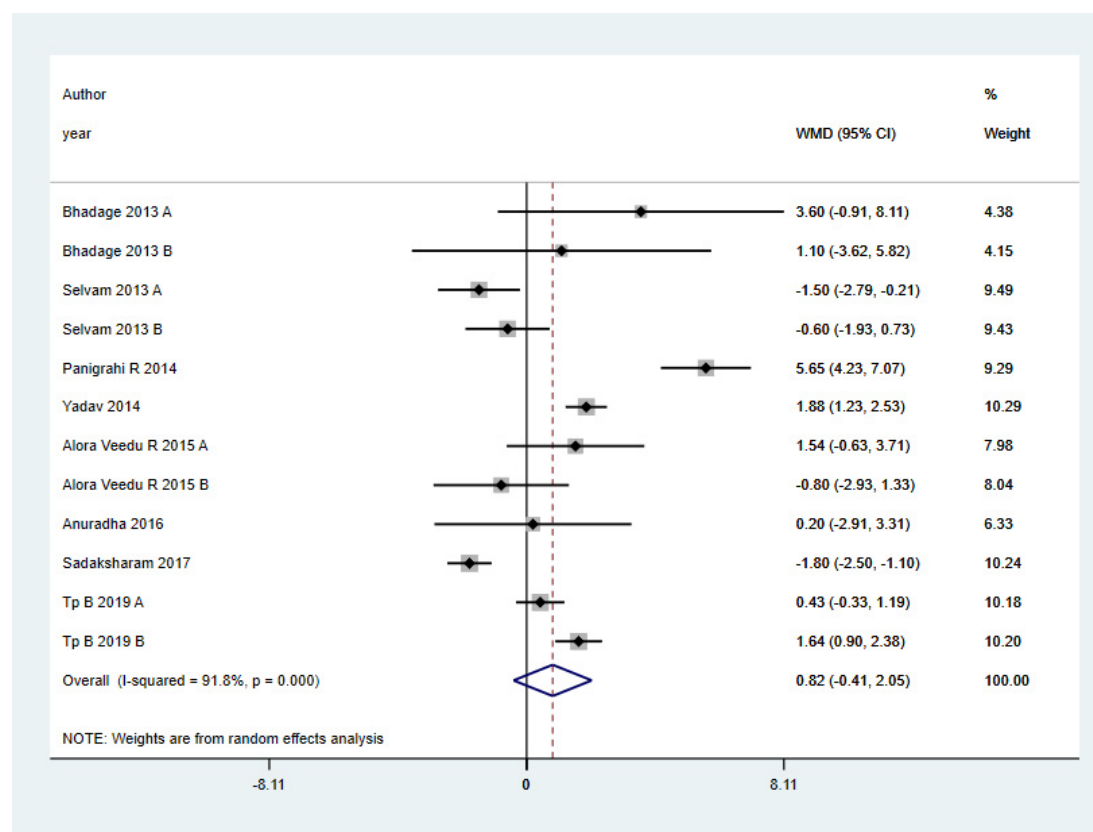

Supplementary Figure S3: Forest plot illustrating the mean improvement in mouth opening between combination therapy of hyaluronidase and corticosteroids with controls (other interventions)

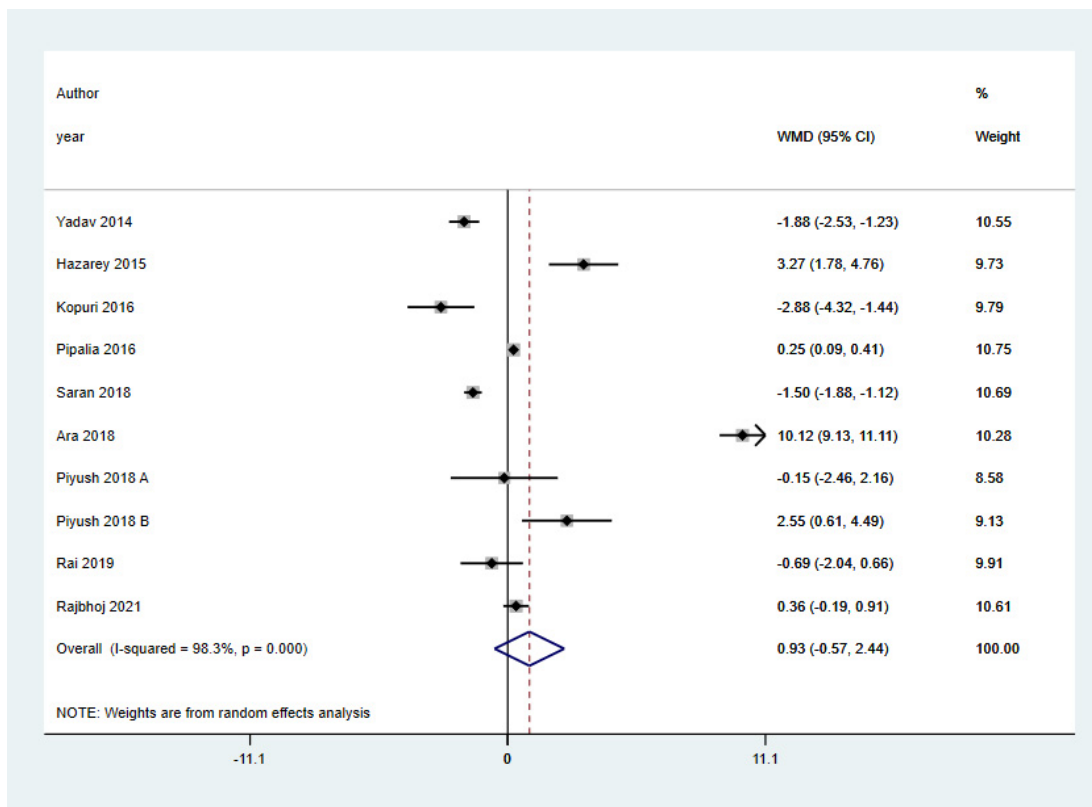

Supplementary Figure S4: Forest plot illustrating the mean improvement in mouth opening between curcumin and controls (other interventions)

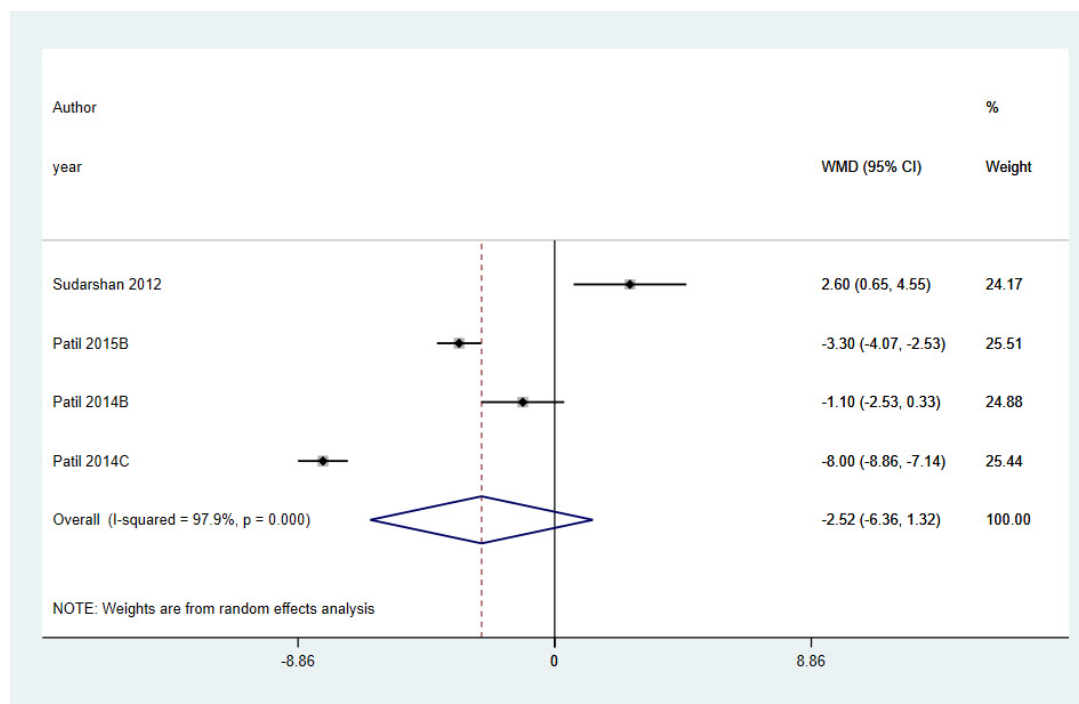

Supplementary Figure S5: Forest plot illustrating the mean improvement in mouth opening between Aloe vera and controls (other interventions)

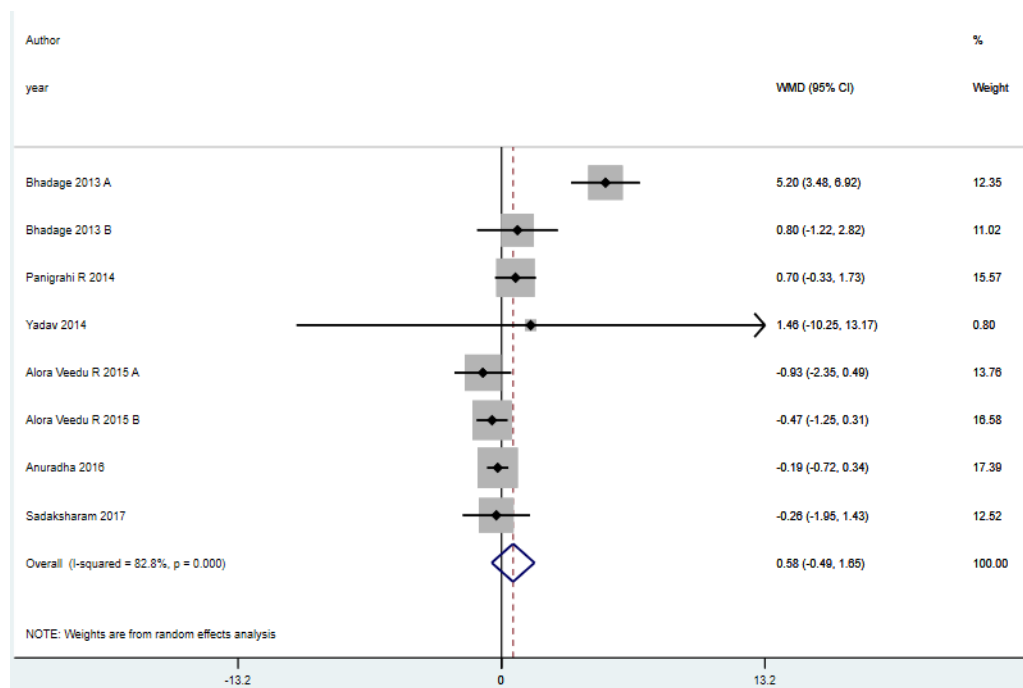

Supplementary Figure S6: Forest plot illustrating the reduction in burning sensation between Lycopene and controls (other interventions)



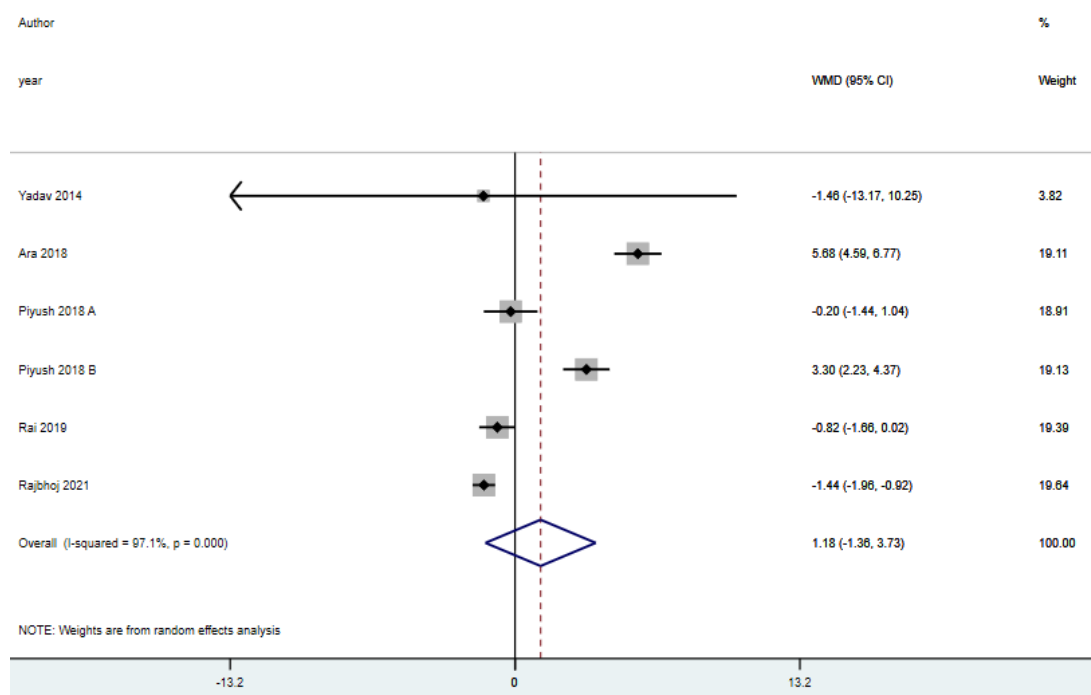

Supplementary Figure S7: Forest plot illustrating the reduction in burning sensation between curcumin and controls (other interventions)

### 5.8.4.3 Publication bias

Forest plots for all meta-analysis comparisons indicated publication bias.

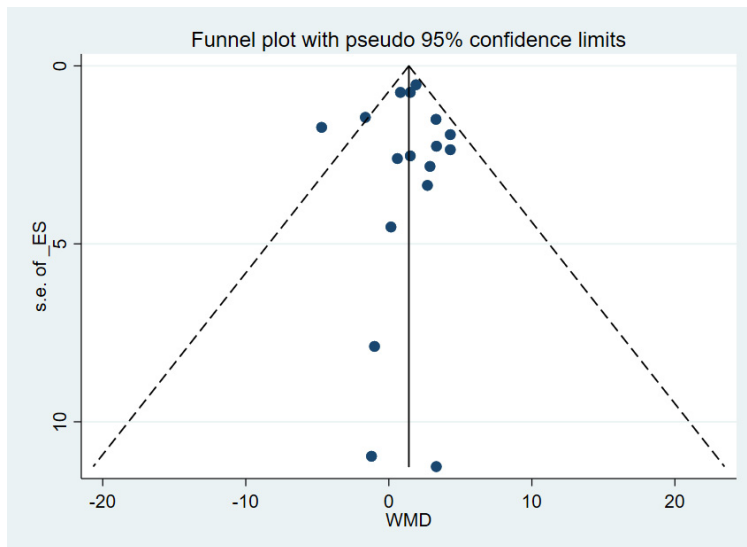

Supplementary Figure S8: Funnel plot illustrating the mean improvement in mouth opening between lycopene and controls (other interventions)

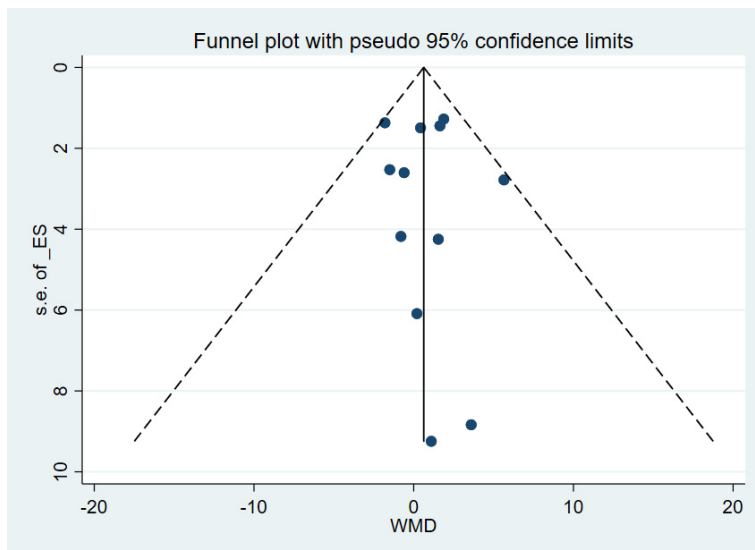

Supplementary Figure S9: Funnel plot illustrating the mean improvement in mouth opening between combination therapy of hyaluronidase and corticosteroids with controls (other interventions)

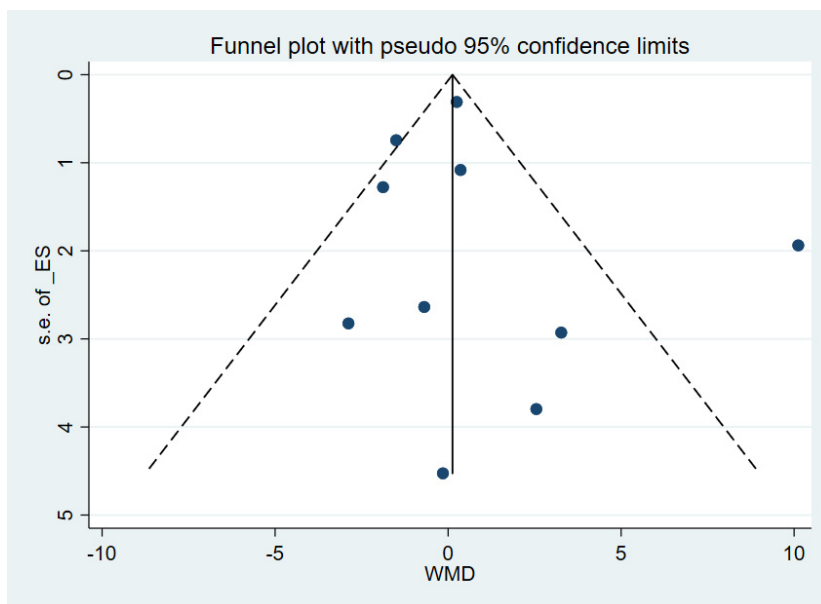

Supplementary Figure S10: Funnel plot illustrating the mean improvement in mouth opening between curcumin and controls (other interventions)

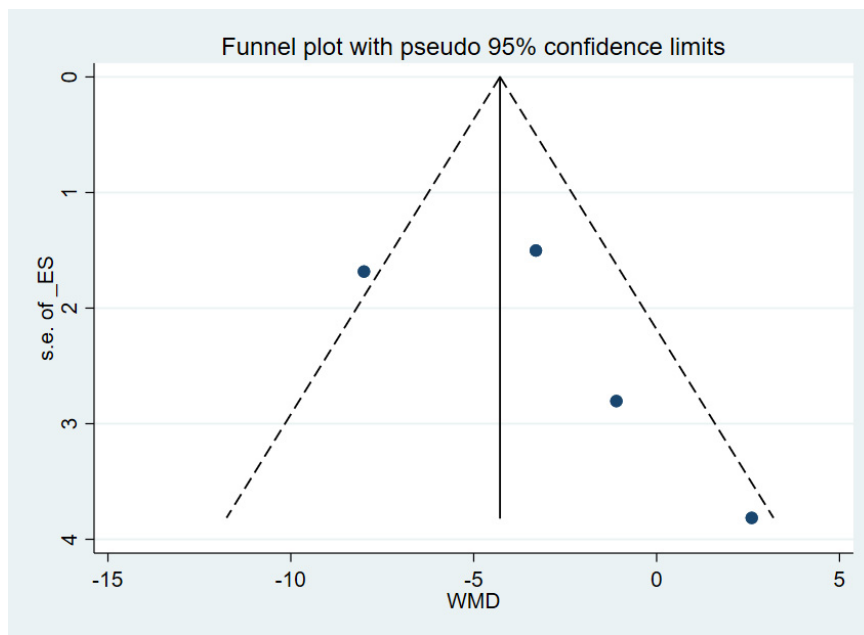

Supplementary Figure S11: Funnel plot illustrating the mean improvement in mouth opening between Aloe vera and controls (other interventions)
